# Supplementary material for: K0.36(H2O)yWS2: a new layered compound for reversible hydrated potassium ion intercalation in aqueous electrolyte
Source: Royal Society of Chemistry journal article supplement (doi:10.1039/c9ra07718a), 2019-01-01
Supplement: c9ra07718a1.pdf [file c9ra07718a1.pdf]

*Supporting Information for*

$K_{0.36}(H_2O)_yWS_2$ : A new layered compound for reversible hydrated potassium ion intercalation in aqueous electrolyte  
Yuanlv Mao,<sup>a, b</sup> Miao Xie,<sup>a, b</sup> Wei Zhao,<sup>\*, a</sup> Kaidi Yuan,<sup>c</sup> Yuqiang Fang,<sup>a, b</sup> and Fuqiang Huang<sup>\*, a, d</sup>

<sup>a</sup>State Key Laboratory of High Performance Ceramics and Superfine Microstructure, Shanghai Institute of Ceramics, Chinese Academy of Sciences, Shanghai 200050, P. R. China

<sup>b</sup>University of Chinese Academy of Sciences, Beijing 100049, China

<sup>c</sup>ShanghaiTech University, Shanghai 201210, China

<sup>d</sup>State Key Laboratory of Rare Earth Materials Chemistry and Applications, College of Chemistry and Molecular Engineering, Peking University, Beijing 100871, P. R. China

**List of contents:**

- 1. Experimental section.**
- 2. Supplementary figures.**
- 3. Supplementary tables.**
- 4. References**

# 1. Experimental Section

**Sample Synthesis.** The reagent WS<sub>2</sub> was synthesized by heating a mixture of W powder and S powder at 973 K under vacuum. The obtained WS<sub>2</sub> powder (0.2480 g; 1 mmol) and K pieces (0.0391 g; 1 mmol) were sealed into carbon-coated fused silica tube. The tube was heated in the furnace at 1073 K for 20 hours and then cooled to room temperature. Finally, the reaction product was washed by distilled water for several times, and K<sub>0.36</sub>(H<sub>2</sub>O)<sub>y</sub>WS<sub>2</sub> was prepared.

**Single Crystal X-ray Crystallography.** A suitable crystal of K<sub>0.36</sub>(H<sub>2</sub>O)<sub>y</sub>WS<sub>2</sub> was selected for XRD data collection at 298 K. Diffraction data were collected using a Bruker D8 QUEST diffractometer equipped with a Mo K $\alpha$  radiation source. The diffraction data were integrated and corrected for absorption using a multi-scan type model by the APEX 2 and SADABS programs. The crystal data and structure refinement details are summarized in Table S3-S6.

**Characterization.** A Bruker D8 QUEST diffractometer equipped with Cu K $\alpha$  radiation was used to collect powder X-ray diffraction data of K<sub>0.36</sub>(H<sub>2</sub>O)<sub>y</sub>WS<sub>2</sub> at 40 kV and 40 mA. Crystal imaging and quantitative microprobe analyses of the compound were performed by a JEOL (JSM6510) scanning electron microscope equipped with a PGT energy-dispersive X-ray analyzer. The accurate atom ratio was determined by ICP-OES. Raman measurement was performed via a thermal dispersive spectrometer using an excitation wavelength of 633 nm. Thermogravimetric analysis (TG) and differential scanning calorimetry (DSC) were conducted under Ar atmosphere at a heating rate of 5 °C/min.

**Resistivity Measurement.** The resistivity measurement was carried out on a Physical Properties Measurement System (PPMS). The polycrystal powders were pressed into pellets and cut into rectangular bars. Thin Cu wires were attached using silver epoxy for four probe resistivity measurements.

**Electrochemical Measurements.** Composite electrodes were fabricated by compressing active materials, carbon black and poly tetra fluoroethylene at a weight ratio of 8:1:1 on titanium mesh. The mass loading of working electrode was 5-6 mg/cm<sup>2</sup>. The three-electrode system for electrochemical measurement consisted of K<sub>0.36</sub>(H<sub>2</sub>O)<sub>y</sub>WS<sub>2</sub> composite

as the working electrode, Pt as the counter-electrode, Ag/AgCl as the reference electrode, 0.5 M  $K_2SO_4$  solution as electrolyte. The cyclic voltammetry (CV) and charge/discharge test were conducted on the electrochemical workstation (CHI660E, Shanghai Chenhua).

## 2. Supplementary figures

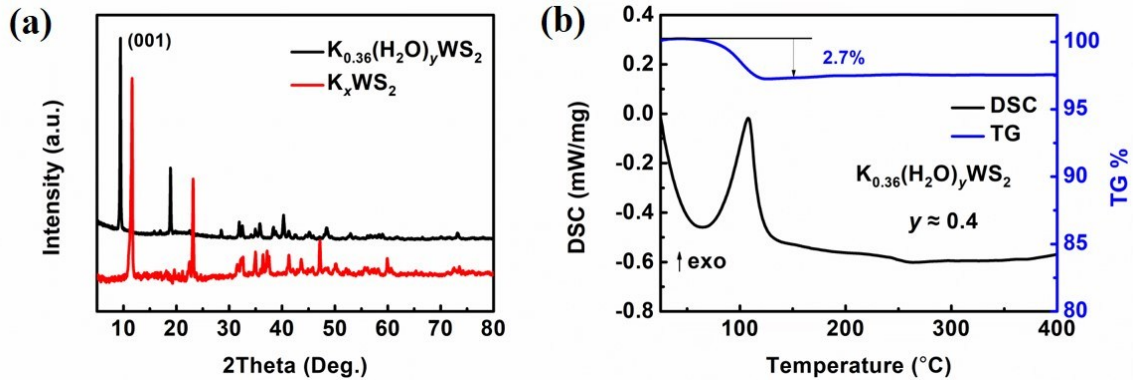

**Figure S1.** (a) Power X-ray diffraction pattern of  $K_{0.36}(H_2O)_yWS_2$  and  $K_xWS_2$ . (b) TG-DSC curves of  $K_{0.36}(H_2O)_yWS_2$ .

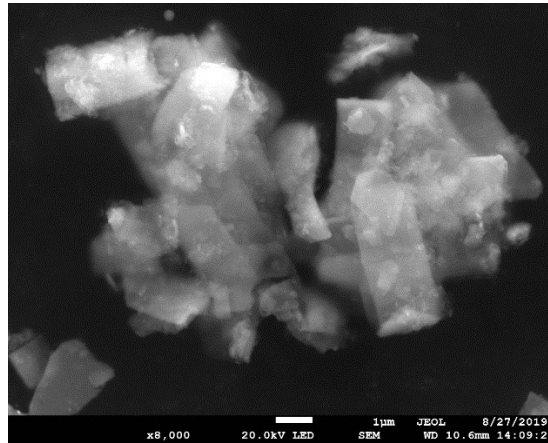

**Figure S2.** SEM pattern of  $K_{0.36}(H_2O)_yWS_2$  hand-milled for fabricating composite electrodes.

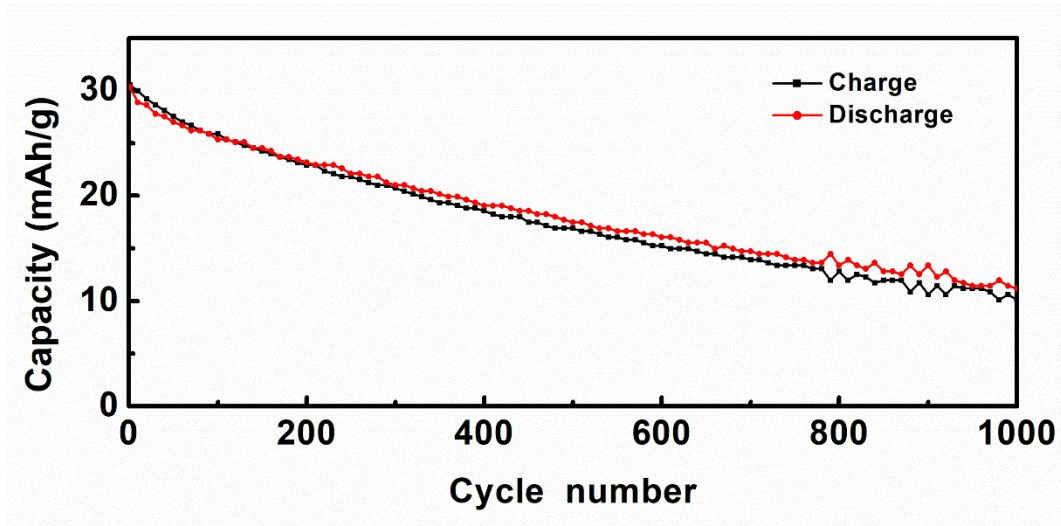

**Figure S3.** Cycling performance of  $K_{0.36}(H_2O)_yWS_2$  electrode at  $2\text{ A g}^{-1}$ .

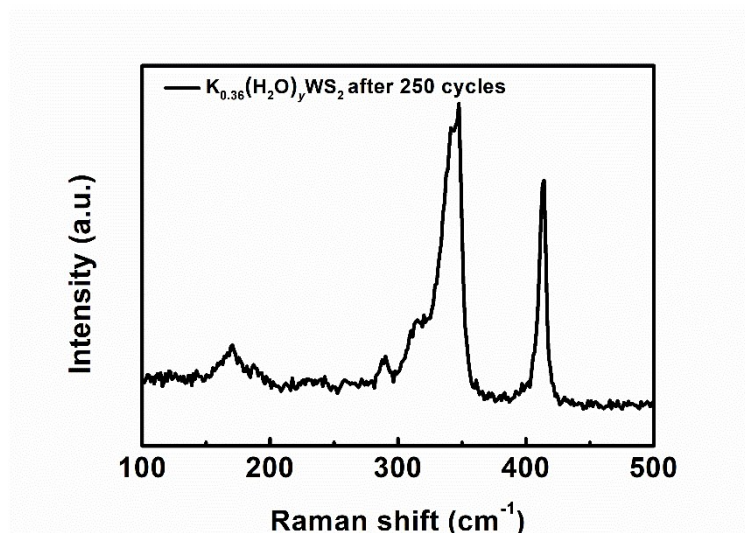

**Figure S4.** Raman spectrum of  $K_{0.36}(H_2O)_yWS_2$  electrode after 250 cycles. The characteristic peaks at  $347$  and  $414\text{ cm}^{-1}$  of  $2H\text{ WS}_2$  were observed.

### 3. Supplementary tables

**Table S1.** ICP-OES result of  $K_{0.36}(H_2O)_yWS_2$ .

| Element | Weight (%) | atom (%) |
|---------|------------|----------|
| W       | 59.96      | 32.62    |
| K       | 4.57       | 11.69    |

**Table S2.** EDS result for  $K_{0.36}(H_2O)_yWS_2$  electrode at initial, extraction and insertion state, respectively.

| State            | Element | Weight (%) | atom (%) | K/W  |
|------------------|---------|------------|----------|------|
| Initial state    | W       | 5.35       | 27.81    | 0.36 |
|                  | K       | 68.38      | 10.14    |      |
| Extraction state | W       | 74.02      | 32.82    | 0    |
|                  | K       | 0          | 0        |      |
| Insertion state  | W       | 67.97      | 27.71    | 0.42 |
|                  | K       | 6.13       | 11.75    |      |

**Table S3.** Crystal data and structure refinement for  $K_{0.36}(H_2O)_yWS_2$ .

|                             |                                   |
|-----------------------------|-----------------------------------|
| Crystal data                |                                   |
| Chemical formula            | $K_{0.36}WS_2$                    |
| $M_r$                       | 262.05                            |
| Crystal system, space group | Monoclinic, $P2_1/m$              |
| Temperature (K)             | 298                               |
| $a, b, c$ (Å)               | 5.693 (2), 3.2498 (11), 9.410 (3) |
| $\beta$ (°)                 | 100.317 (7)                       |
| $V$ (Å <sup>3</sup> )       | 171.28 (10)                       |
| $Z$                         | 2                                 |
| Radiation type              | Mo $K\alpha$                      |
| $\mu$ (mm <sup>-1</sup> )   | 35.08                             |
| Crystal size (mm)           | 0.07 × 0.05 × 0.03                |
| Data collection             |                                   |

|                                                                            |                    |
|----------------------------------------------------------------------------|--------------------|
| Diffractometer                                                             | CCD area detector  |
| Absorption correction                                                      | Multi-scan         |
| $T_{\min}, T_{\max}$                                                       | 0.140, 0.349       |
| No. of measured, independent and observed [ $I > 2\sigma(I)$ ] reflections | 1459, 439, 419     |
| $R_{\text{int}}$                                                           | 0.033              |
| $(\sin \theta/\lambda)_{\max}$ ( $\text{\AA}^{-1}$ )                       | 0.649              |
| Refinement                                                                 |                    |
| $R[F^2 > 2\sigma(F^2)], wR(F^2), S$                                        | 0.031, 0.081, 1.12 |
| No. of reflections                                                         | 439                |
| No. of parameters                                                          | 33                 |
| $\Delta\rho_{\max}, \Delta\rho_{\min}$ ( $e \text{\AA}^{-3}$ )             | 1.30, -1.59        |

<sup>a</sup> $R_1 = \sum ||F_o| - |F_c|| / \sum |F_o|$ . <sup>b</sup> $wR_2 = \{\sum [w(F_o^2 - F_c^2)^2] / \sum [w(F_o^2)^2]\}^{1/2}$ ,  $w = 1/[\sigma^2(F_o^2) + (0.1000P)^2]$ , where  $P = (F_o^2 + 2F_c^2)/3$ .

**Table S4.** Fractional atomic coordinates and isotropic or equivalent isotropic displacement parameters ( $\text{\AA}^2$ ) for  $\text{K}_{0.36}(\text{H}_2\text{O})_y\text{WS}_2$ .

|    | $x$         | $y$    | $z$         | $U_{\text{iso}}^*/U_{\text{eq}}$ | Occ. (<1)  |
|----|-------------|--------|-------------|----------------------------------|------------|
| W  | 0.30202 (6) | 0.7500 | 0.49371 (4) | 0.0259 (2)                       |            |
| S1 | 0.6435 (5)  | 0.7500 | 0.6855 (3)  | 0.0279 (6)                       |            |
| S2 | 0.1253 (5)  | 0.2500 | 0.6412 (3)  | 0.0267 (5)                       |            |
| K1 | 0.316 (10)  | 0.7500 | 0.958 (4)   | 0.129 (9)                        | 0.177 (14) |
| K2 | 0.148 (10)  | 0.7500 | 0.964 (4)   | 0.129 (9)                        | 0.183 (14) |

**Table S5.** Atomic displacement parameters ( $\text{\AA}^2$ ) for  $\text{K}_{0.36}(\text{H}_2\text{O})_y\text{WS}_2$ .

|    | $U^{11}$    | $U^{22}$    | $U^{33}$    | $U^{12}$ | $U^{13}$    | $U^{23}$ |
|----|-------------|-------------|-------------|----------|-------------|----------|
| W  | 0.0200 (3)  | 0.0262 (3)  | 0.0314 (3)  | 0.000    | 0.0046 (2)  | 0.000    |
| S1 | 0.0246 (13) | 0.0246 (12) | 0.0343 (13) | 0.000    | 0.0044 (11) | 0.000    |
| S2 | 0.0230 (12) | 0.0244 (12) | 0.0329 (13) | 0.000    | 0.0056 (10) | 0.000    |
| K1 | 0.115 (18)  | 0.22 (2)    | 0.046 (7)   | 0.000    | 0.010 (16)  | 0.000    |
| K2 | 0.115 (18)  | 0.22 (2)    | 0.046 (7)   | 0.000    | 0.009 (16)  | 0.000    |

**Table S6.** Geometric parameters (Å, °) for  $K_{0.36}(H_2O)_yWS_2$ .

|                                       |             |                                         |             |
|---------------------------------------|-------------|-----------------------------------------|-------------|
| W—S1 <sup>i</sup>                     | 2.402 (2)   | S2—K2                                   | 3.42 (3)    |
| W—S1 <sup>ii</sup>                    | 2.402 (2)   | K1—K1 <sup>vi</sup>                     | 2.66 (8)    |
| W—S1                                  | 2.404 (3)   | K1—K1 <sup>vii</sup>                    | 2.66 (8)    |
| W—S2 <sup>iii</sup>                   | 2.466 (2)   | K1—K1 <sup>iii</sup>                    | 3.2498 (12) |
| W—S2                                  | 2.466 (2)   | K1—K1 <sup>viii</sup>                   | 3.2498 (11) |
| W—S2 <sup>iv</sup>                    | 2.534 (3)   | K1—S2 <sup>iii</sup>                    | 3.40 (3)    |
| W—W <sup>ii</sup>                     | 2.7641 (9)  | K1—S1 <sup>vi</sup>                     | 3.70 (4)    |
| W—W <sup>i</sup>                      | 2.7641 (9)  | K1—S1 <sup>vii</sup>                    | 3.70 (4)    |
| S1—W <sup>i</sup>                     | 2.402 (2)   | K1—K1 <sup>ix</sup>                     | 4.15 (11)   |
| S1—W <sup>ii</sup>                    | 2.402 (2)   | K1—K1 <sup>x</sup>                      | 4.15 (11)   |
| S1—K1                                 | 3.43 (5)    | K2—K2 <sup>ix</sup>                     | 2.52 (8)    |
| S1—K2 <sup>v</sup>                    | 3.52 (5)    | K2—K2 <sup>x</sup>                      | 2.52 (8)    |
| S1—K2 <sup>vi</sup>                   | 3.68 (3)    | K2—K2 <sup>iii</sup>                    | 3.2498 (12) |
| S1—K2 <sup>vii</sup>                  | 3.68 (3)    | K2—K2 <sup>viii</sup>                   | 3.2498 (12) |
| S1—K1 <sup>vi</sup>                   | 3.70 (4)    | K2—S2 <sup>iii</sup>                    | 3.42 (3)    |
| S1—K1 <sup>vii</sup>                  | 3.70 (4)    | K2—S1 <sup>xi</sup>                     | 3.52 (5)    |
| S2—W <sup>viii</sup>                  | 2.466 (2)   | K2—S1 <sup>vi</sup>                     | 3.68 (3)    |
| S2—W <sup>iv</sup>                    | 2.534 (3)   | K2—S1 <sup>vii</sup>                    | 3.68 (3)    |
| S2—K1 <sup>viii</sup>                 | 3.40 (3)    | K2—K2 <sup>vi</sup>                     | 4.26 (11)   |
| S2—K1                                 | 3.40 (3)    | K2—K2 <sup>vii</sup>                    | 4.26 (11)   |
| S2—K2 <sup>viii</sup>                 | 3.42 (3)    |                                         |             |
| S1 <sup>i</sup> —W—S1 <sup>ii</sup>   | 85.15 (11)  | S2—K1—S1                                | 58.3 (7)    |
| S1 <sup>i</sup> —W—S1                 | 109.78 (8)  | S2 <sup>iii</sup> —K1—S1                | 58.3 (7)    |
| S1 <sup>ii</sup> —W—S1                | 109.78 (8)  | K1 <sup>vi</sup> —K1—S1 <sup>vi</sup>   | 62.9 (15)   |
| S1 <sup>i</sup> —W—S2 <sup>iii</sup>  | 163.37 (11) | K1 <sup>vii</sup> —K1—S1 <sup>vi</sup>  | 94.8 (17)   |
| S1 <sup>ii</sup> —W—S2 <sup>iii</sup> | 93.82 (7)   | K1 <sup>iii</sup> —K1—S1 <sup>vi</sup>  | 63.9 (3)    |
| S1—W—S2 <sup>iii</sup>                | 86.22 (10)  | K1 <sup>viii</sup> —K1—S1 <sup>vi</sup> | 116.1 (3)   |
| S1 <sup>i</sup> —W—S2                 | 93.82 (7)   | S2—K1—S1 <sup>vi</sup>                  | 164.6 (19)  |
| S1 <sup>ii</sup> —W—S2                | 163.37 (11) | S2 <sup>iii</sup> —K1—S1 <sup>vi</sup>  | 123.0 (5)   |
| S1—W—S2                               | 86.22 (10)  | S1—K1—S1 <sup>vi</sup>                  | 136.4 (13)  |



---

|                                       |             |                                          |            |
|---------------------------------------|-------------|------------------------------------------|------------|
| S2 <sup>iii</sup> —W—S2               | 82.44 (10)  | K1 <sup>vi</sup> —K1—S1 <sup>vii</sup>   | 94.8 (17)  |
| S1 <sup>i</sup> —W—S2 <sup>iv</sup>   | 83.17 (10)  | K1 <sup>vii</sup> —K1—S1 <sup>vii</sup>  | 62.9 (15)  |
| S1 <sup>ii</sup> —W—S2 <sup>iv</sup>  | 83.17 (9)   | K1 <sup>iii</sup> —K1—S1 <sup>vii</sup>  | 116.1 (3)  |
| S1—W—S2 <sup>iv</sup>                 | 161.93 (12) | K1 <sup>viii</sup> —K1—S1 <sup>vii</sup> | 63.9 (3)   |
| S2 <sup>iii</sup> —W—S2 <sup>iv</sup> | 80.23 (9)   | S2—K1—S1 <sup>vii</sup>                  | 123.0 (5)  |
| S2—W—S2 <sup>iv</sup>                 | 80.23 (9)   | S2 <sup>iii</sup> —K1—S1 <sup>vii</sup>  | 164.6 (19) |
| S1 <sup>i</sup> —W—W <sup>ii</sup>    | 102.77 (7)  | S1—K1—S1 <sup>vii</sup>                  | 136.4 (13) |
| S1 <sup>ii</sup> —W—W <sup>ii</sup>   | 54.94 (7)   | S1 <sup>vi</sup> —K1—S1 <sup>vii</sup>   | 52.2 (6)   |
| S1—W—W <sup>ii</sup>                  | 54.85 (6)   | K1 <sup>vi</sup> —K1—K1 <sup>ix</sup>    | 148 (3)    |
| S2 <sup>iii</sup> —W—W <sup>ii</sup>  | 90.02 (6)   | K1 <sup>vii</sup> —K1—K1 <sup>ix</sup>   | 111.6 (15) |
| S2—W—W <sup>ii</sup>                  | 140.82 (7)  | K1 <sup>iii</sup> —K1—K1 <sup>ix</sup>   | 113.0 (6)  |
| S2 <sup>iv</sup> —W—W <sup>ii</sup>   | 136.35 (4)  | K1 <sup>viii</sup> —K1—K1 <sup>ix</sup>  | 67.0 (7)   |
| S1 <sup>i</sup> —W—W <sup>i</sup>     | 54.94 (7)   | S2—K1—K1 <sup>ix</sup>                   | 80.1 (10)  |
| S1 <sup>ii</sup> —W—W <sup>i</sup>    | 102.77 (7)  | S2 <sup>iii</sup> —K1—K1 <sup>ix</sup>   | 101.6 (15) |
| S1—W—W <sup>i</sup>                   | 54.85 (6)   | S1—K1—K1 <sup>ix</sup>                   | 138.4 (13) |
| S2 <sup>iii</sup> —W—W <sup>i</sup>   | 140.82 (7)  | S1 <sup>vi</sup> —K1—K1 <sup>ix</sup>    | 85.2 (15)  |
| S2—W—W <sup>i</sup>                   | 90.02 (6)   | S1 <sup>vii</sup> —K1—K1 <sup>ix</sup>   | 64.6 (10)  |
| S2 <sup>iv</sup> —W—W <sup>i</sup>    | 136.35 (4)  | K1 <sup>vi</sup> —K1—K1 <sup>x</sup>     | 111.6 (15) |
| W <sup>ii</sup> —W—W <sup>i</sup>     | 72.01 (3)   | K1 <sup>vii</sup> —K1—K1 <sup>x</sup>    | 148 (3)    |
| W <sup>i</sup> —S1—W <sup>ii</sup>    | 85.15 (11)  | K1 <sup>iii</sup> —K1—K1 <sup>x</sup>    | 67.0 (6)   |
| W <sup>i</sup> —S1—W                  | 70.22 (8)   | K1 <sup>viii</sup> —K1—K1 <sup>x</sup>   | 113.0 (6)  |
| W <sup>ii</sup> —S1—W                 | 70.22 (8)   | S2—K1—K1 <sup>x</sup>                    | 101.6 (15) |
| W <sup>i</sup> —S1—K1                 | 132.9 (3)   | S2 <sup>iii</sup> —K1—K1 <sup>x</sup>    | 80.1 (10)  |
| W <sup>ii</sup> —S1—K1                | 132.9 (3)   | S1—K1—K1 <sup>x</sup>                    | 138.4 (13) |
| W—S1—K1                               | 95.0 (7)    | S1 <sup>vi</sup> —K1—K1 <sup>x</sup>     | 64.6 (10)  |
| W <sup>i</sup> —S1—K2 <sup>v</sup>    | 109.3 (6)   | S1 <sup>vii</sup> —K1—K1 <sup>x</sup>    | 85.2 (15)  |
| W <sup>ii</sup> —S1—K2 <sup>v</sup>   | 109.3 (6)   | K1 <sup>ix</sup> —K1—K1 <sup>x</sup>     | 46.1 (13)  |
| W—S1—K2 <sup>v</sup>                  | 179.4 (8)   | K2 <sup>ix</sup> —K2—K2 <sup>x</sup>     | 80 (3)     |
| W <sup>i</sup> —S1—K2 <sup>vi</sup>   | 150.1 (7)   | K2 <sup>ix</sup> —K2—K2 <sup>iii</sup>   | 130.1 (16) |
| W <sup>ii</sup> —S1—K2 <sup>vi</sup>  | 105.7 (4)   | K2 <sup>x</sup> —K2—K2 <sup>iii</sup>    | 49.9 (16)  |
| W—S1—K2 <sup>vi</sup>                 | 139.5 (8)   | K2 <sup>ix</sup> —K2—K2 <sup>viii</sup>  | 49.9 (16)  |
| K2 <sup>v</sup> —S1—K2 <sup>vi</sup>  | 40.9 (13)   | K2 <sup>x</sup> —K2—K2 <sup>viii</sup>   | 130.1 (16) |

---

---

|                                          |            |                                          |              |
|------------------------------------------|------------|------------------------------------------|--------------|
| W <sup>i</sup> —S1—K2 <sup>vii</sup>     | 105.7 (4)  | K2 <sup>iii</sup> —K2—K2 <sup>viii</sup> | 179.999 (19) |
| W <sup>ii</sup> —S1—K2 <sup>vii</sup>    | 150.1 (7)  | K2 <sup>ix</sup> —K2—S2                  | 90.8 (13)    |
| W—S1—K2 <sup>vii</sup>                   | 139.5 (8)  | K2 <sup>x</sup> —K2—S2                   | 129 (3)      |
| K2 <sup>v</sup> —S1—K2 <sup>vii</sup>    | 40.9 (13)  | K2 <sup>iii</sup> —K2—S2                 | 118.3 (3)    |
| K2 <sup>vi</sup> —S1—K2 <sup>vii</sup>   | 52.4 (5)   | K2 <sup>viii</sup> —K2—S2                | 61.7 (3)     |
| W <sup>i</sup> —S1—K1 <sup>vi</sup>      | 160.0 (4)  | K2 <sup>ix</sup> —K2—S2 <sup>iii</sup>   | 129 (3)      |
| W <sup>ii</sup> —S1—K1 <sup>vi</sup>     | 110.2 (4)  | K2 <sup>x</sup> —K2—S2 <sup>iii</sup>    | 90.8 (13)    |
| W—S1—K1 <sup>vi</sup>                    | 126.3 (8)  | K2 <sup>iii</sup> —K2—S2 <sup>iii</sup>  | 61.7 (3)     |
| K1—S1—K1 <sup>vi</sup>                   | 43.6 (13)  | K2 <sup>viii</sup> —K2—S2 <sup>iii</sup> | 118.3 (3)    |
| W <sup>i</sup> —S1—K1 <sup>vii</sup>     | 110.2 (4)  | S2—K2—S2 <sup>iii</sup>                  | 56.7 (6)     |
| W <sup>ii</sup> —S1—K1 <sup>vii</sup>    | 160.0 (4)  | K2 <sup>ix</sup> —K2—S1 <sup>xi</sup>    | 73 (2)       |
| W—S1—K1 <sup>vii</sup>                   | 126.3 (8)  | K2 <sup>x</sup> —K2—S1 <sup>xi</sup>     | 73 (2)       |
| K1—S1—K1 <sup>vii</sup>                  | 43.6 (13)  | K2 <sup>iii</sup> —K2—S1 <sup>xi</sup>   | 90.000 (6)   |
| K1 <sup>vi</sup> —S1—K1 <sup>vii</sup>   | 52.2 (6)   | K2 <sup>viii</sup> —K2—S1 <sup>xi</sup>  | 90.000 (8)   |
| W <sup>viii</sup> —S2—W                  | 82.44 (10) | S2—K2—S1 <sup>xi</sup>                   | 56.3 (6)     |
| W <sup>viii</sup> —S2—W <sup>iv</sup>    | 99.77 (9)  | S2 <sup>iii</sup> —K2—S1 <sup>xi</sup>   | 56.3 (6)     |
| W—S2—W <sup>iv</sup>                     | 99.77 (9)  | K2 <sup>ix</sup> —K2—S1 <sup>vi</sup>    | 99.4 (18)    |
| W <sup>viii</sup> —S2—K1 <sup>viii</sup> | 94.6 (7)   | K2 <sup>x</sup> —K2—S1 <sup>vi</sup>     | 66.1 (14)    |
| W—S2—K1 <sup>viii</sup>                  | 135.3 (9)  | K2 <sup>iii</sup> —K2—S1 <sup>vi</sup>   | 63.8 (2)     |
| W <sup>iv</sup> —S2—K1 <sup>viii</sup>   | 124.5 (9)  | K2 <sup>viii</sup> —K2—S1 <sup>vi</sup>  | 116.2 (2)    |
| W <sup>viii</sup> —S2—K1                 | 135.3 (9)  | S2—K2—S1 <sup>vi</sup>                   | 163.6 (18)   |
| W—S2—K1                                  | 94.6 (7)   | S2 <sup>iii</sup> —K2—S1 <sup>vi</sup>   | 122.7 (5)    |
| W <sup>iv</sup> —S2—K1                   | 124.5 (9)  | S1 <sup>xi</sup> —K2—S1 <sup>vi</sup>    | 139.1 (13)   |
| K1 <sup>viii</sup> —S2—K1                | 57.1 (6)   | K2 <sup>ix</sup> —K2—S1 <sup>vii</sup>   | 66.1 (14)    |
| W <sup>viii</sup> —S2—K2 <sup>viii</sup> | 103.4 (5)  | K2 <sup>x</sup> —K2—S1 <sup>vii</sup>    | 99.4 (18)    |
| W—S2—K2 <sup>viii</sup>                  | 149.0 (8)  | K2 <sup>iii</sup> —K2—S1 <sup>vii</sup>  | 116.2 (2)    |
| W <sup>iv</sup> —S2—K2 <sup>viii</sup>   | 108.9 (10) | K2 <sup>viii</sup> —K2—S1 <sup>vii</sup> | 63.8 (2)     |
| W <sup>viii</sup> —S2—K2                 | 149.0 (8)  | S2—K2—S1 <sup>vii</sup>                  | 122.7 (5)    |
| W—S2—K2                                  | 103.4 (5)  | S2 <sup>iii</sup> —K2—S1 <sup>vii</sup>  | 163.6 (18)   |
| W <sup>iv</sup> —S2—K2                   | 108.9 (9)  | S1 <sup>xi</sup> —K2—S1 <sup>vii</sup>   | 139.1 (13)   |
| K2 <sup>viii</sup> —S2—K2                | 56.7 (6)   | S1 <sup>vi</sup> —K2—S1 <sup>vii</sup>   | 52.4 (5)     |
| K1 <sup>vi</sup> —K1—K1 <sup>vii</sup>   | 75 (3)     | K2 <sup>ix</sup> —K2—K2 <sup>vi</sup>    | 149 (3)      |

---

|                                          |            |                                          |            |
|------------------------------------------|------------|------------------------------------------|------------|
| K1 <sup>vi</sup> —K1—K1 <sup>iii</sup>   | 52.3 (14)  | K2 <sup>x</sup> —K2—K2 <sup>vi</sup>     | 111.4 (14) |
| K1 <sup>vii</sup> —K1—K1 <sup>iii</sup>  | 127.7 (13) | K2 <sup>iii</sup> —K2—K2 <sup>vi</sup>   | 67.6 (6)   |
| K1 <sup>vi</sup> —K1—K1 <sup>viii</sup>  | 127.7 (13) | K2 <sup>viii</sup> —K2—K2 <sup>vi</sup>  | 112.4 (6)  |
| K1 <sup>vii</sup> —K1—K1 <sup>viii</sup> | 52.3 (14)  | S2—K2—K2 <sup>vi</sup>                   | 102.0 (16) |
| K1 <sup>iii</sup> —K1—K1 <sup>viii</sup> | 180.0      | S2 <sup>iii</sup> —K2—K2 <sup>vi</sup>   | 81.2 (11)  |
| K1 <sup>vi</sup> —K1—S2                  | 132 (3)    | S1 <sup>xi</sup> —K2—K2 <sup>vi</sup>    | 137.5 (13) |
| K1 <sup>vii</sup> —K1—S2                 | 94.5 (14)  | S1 <sup>vi</sup> —K2—K2 <sup>vi</sup>    | 62.9 (8)   |
| K1 <sup>iii</sup> —K1—S2                 | 118.5 (3)  | S1 <sup>vii</sup> —K2—K2 <sup>vi</sup>   | 83.2 (12)  |
| K1 <sup>viii</sup> —K1—S2                | 61.4 (3)   | K2 <sup>ix</sup> —K2—K2 <sup>vii</sup>   | 111.4 (14) |
| K1 <sup>vi</sup> —K1—S2 <sup>iii</sup>   | 94.5 (14)  | K2 <sup>x</sup> —K2—K2 <sup>vii</sup>    | 149 (3)    |
| K1 <sup>vii</sup> —K1—S2 <sup>iii</sup>  | 132 (3)    | K2 <sup>iii</sup> —K2—K2 <sup>vii</sup>  | 112.4 (6)  |
| K1 <sup>iii</sup> —K1—S2 <sup>iii</sup>  | 61.5 (3)   | K2 <sup>viii</sup> —K2—K2 <sup>vii</sup> | 67.6 (6)   |
| K1 <sup>viii</sup> —K1—S2 <sup>iii</sup> | 118.5 (3)  | S2—K2—K2 <sup>vii</sup>                  | 81.2 (11)  |
| S2—K1—S2 <sup>iii</sup>                  | 57.1 (6)   | S2 <sup>iii</sup> —K2—K2 <sup>vii</sup>  | 102.0 (16) |
| K1 <sup>vi</sup> —K1—S1                  | 74 (2)     | S1 <sup>xi</sup> —K2—K2 <sup>vii</sup>   | 137.5 (13) |
| K1 <sup>vii</sup> —K1—S1                 | 74 (2)     | S1 <sup>vi</sup> —K2—K2 <sup>vii</sup>   | 83.2 (12)  |
| K1 <sup>iii</sup> —K1—S1                 | 90.000 (6) | S1 <sup>vii</sup> —K2—K2 <sup>vii</sup>  | 62.9 (8)   |
| K1 <sup>viii</sup> —K1—S1                | 90.000 (3) | K2 <sup>vi</sup> —K2—K2 <sup>vii</sup>   | 44.8 (12)  |

Symmetry codes: (i)  $-x+1, -y+1, -z+1$ ; (ii)  $-x+1, -y+2, -z+1$ ; (iii)  $x, y+1, z$ ; (iv)  $-x, -y+1, -z+1$ ; (v)  $x+1, y, z$ ; (vi)  $-x+1, -y+2, -z+2$ ; (vii)  $-x+1, -y+1, -z+2$ ; (viii)  $x, y-1, z$ ; (ix)  $-x, -y+1, -z+2$ ; (x)  $-x, -y+2, -z+2$ .

## 4. References

(1) Sheldrick, G, *Acta Crystallogr., Sect C*, 2015, **71**, 3-8.
